# Supplementary material
Source: publisher site journal article supplement (https://www.spandidos-publications.com/2131/downloadSupplementary)
Supplement: Supplementary file 1 [file downloadSupplementary]

Figure S1. Representative images of staining for KDM6A, EZH2 and H3K27me3 in the control images from the adjacent benign urothelium. Magnification, x100. KDM6A, lysine demethylase 6A; EZH2, histone-lysine N-methyltransferase EZH2.

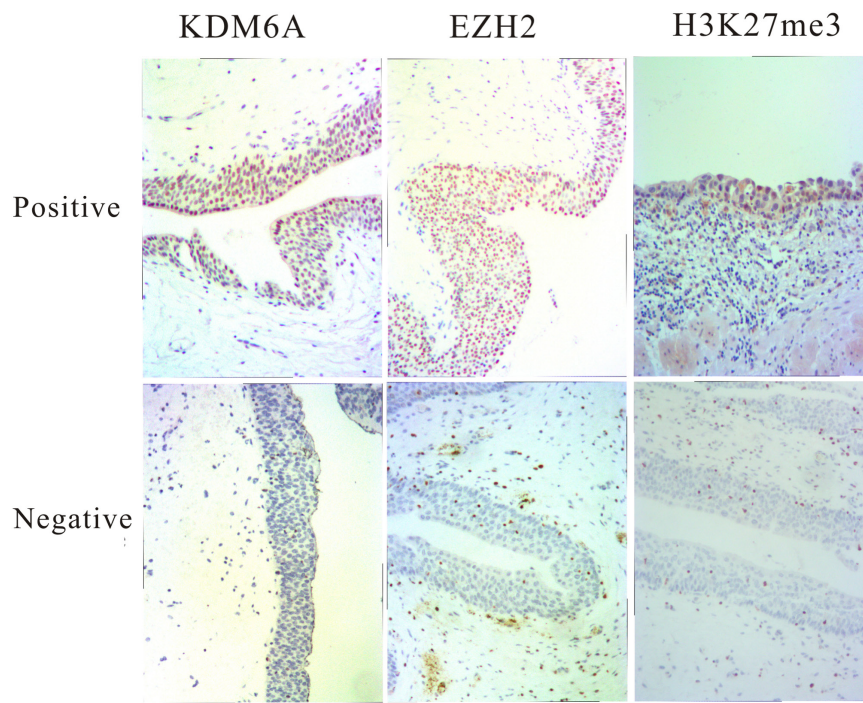

Table SI. Expression of KDM6A, EZH2 and H3K27me3 in UTUC compared with that in the normal urothelium.

| A, Expression of KDM6A in UTUC and normal urothelium    |                   |                   |         |
|---------------------------------------------------------|-------------------|-------------------|---------|
|                                                         | UTUC <sup>-</sup> | UTUC <sup>+</sup> | P-value |
| Normal urothelium <sup>-</sup>                          | 2                 | 4                 | 0.033   |
| Normal urothelium <sup>+</sup>                          | 19                | 4                 |         |
| B, Expression of EZH2 in UTUC and normal urothelium     |                   |                   |         |
|                                                         | UTUC <sup>-</sup> | UTUC <sup>+</sup> | P-value |
| Normal urothelium <sup>-</sup>                          | 13                | 8                 | 0.035   |
| Normal urothelium <sup>+</sup>                          | 1                 | 7                 |         |
| C, Expression of H3K27me3 in UTUC and normal urothelium |                   |                   |         |
|                                                         | UTUC <sup>-</sup> | UTUC <sup>+</sup> | P-value |
| Normal urothelium <sup>-</sup>                          | 12                | 10                | 0.390   |
| Normal urothelium <sup>+</sup>                          | 2                 | 5                 |         |

UTUC, upper tract urothelial carcinoma; KDM6A, lysine demethylase 6A; EZH2, histone-lysine N-methyltransferase EZH2; -, negative; +, positive.
